# Supplementary material for: SOX2-Upregulated microRNA-30e Promotes the Progression of Esophageal Cancer via Regulation of the USP4/SMAD4/CK2 Axis
Source: PubMed Central journal article supplement — Mol Ther Nucleic Acids. 2020 Oct 22;23:200–14. doi: 10.1016/j.omtn.2020.10.027 (PMC7750169; doi:10.1016/j.omtn.2020.10.027), 2020-10-22
Supplement: mmc1.pdf [file mmc1.pdf]

**OMTN, Volume 23**

**Supplemental Information**

**SOX2-Upregulated microRNA-30e Promotes  
the Progression of Esophageal Cancer  
via Regulation of the USP4/SMAD4/CK2 Axis**

**Yang Yang, Xin Fan, Yukai Ren, Kai Wu, Xiangyu Tian, Fengbiao Wen, Donglei Liu, Yuxia Fan, and Song Zhao**

### Supplementary Figure legends

**Fig. S1.** SOX2 promotes proliferation, migration, and invasion, as well as EMT of TE-1 cells *via* miR-30e upregulation *in vitro*. A, Expression of SOX2 and miR-30e in TE-1 cells transfected with sh-SOX2-1 or sh-SOX2-2 measured by RT-qPCR. B, Expression of SOX2 and miR-30e in TE-1 cells transfected with sh-SOX2 or in combination with miR-30e mimic measured by RT-qPCR. C, Proliferation of TE-1 cells detected by EdU assay ( $\times 200$ ). D, Migration of TE-1 cells detected by scratch test. E, Invasion of TE-1 cells detected by Transwell assay ( $\times 200$ ). F, Western blot analysis of EMT-related proteins (E-cadherin, N-cadherin, and Vimentin) in TE-1 cells. \* indicates  $p < 0.05$ , \*\* indicates  $p < 0.01$ , \*\*\* indicates  $p < 0.001$ , \*\*\*\* indicates  $p < 0.0001$ . Comparisons among multiple groups were performed using one-way ANOVA. Data are shown as mean  $\pm$  standard deviation of three technical replicates.

**Fig. S2.** miR-30e promotes cell proliferation, migration, invasion, and EMT in TE-1 cells by targeting USP4 *in vitro*. A, Expression of USP4 and miR-30e determined by RT-qPCR in TE-1 cells transfected with miR-30e inhibitor or in combination with sh-USP4. B, Proliferation of TE-1 cells detected by EdU assay ( $\times 200$ ). C, Migration of TE-1 cells detected by scratch test. D, Invasion of TE-1 cells detected by Transwell assay ( $\times 200$ ). E, Western blot analysis of EMT-related proteins (E-cadherin, N-cadherin, and Vimentin) in TE-1 cells. \* indicates  $p < 0.05$ , \*\* indicates  $p < 0.01$ , \*\*\* indicates  $p < 0.001$ , \*\*\*\* indicates  $p < 0.0001$ . Comparisons among multiple groups were performed using one-way ANOVA. Data are shown as mean  $\pm$  standard deviation of three technical replicates.

**Fig. S3.** SMAD4 decreased CK2 expression to suppress proliferation, migration, invasion, and EMT of TE-1 cells *in vitro*. A, mRNA expression of SMAD4 and CK2 in TE-1 cells treated with oe-SMAD4 detected by RT-qPCR. B, Western blot analysis of SMAD4 and CK2 proteins in TE-1 cells treated with oe-SMAD4. C, Enrichment of SMAD4 in CK2 promoter region determined by ChIP assay in oe-SMAD4-treated TE-1 cells. TE-1 cells were transfected with oe-NC, oe-SMAD4, and oe-SMAD4 + oe-CK2. D, Expression of SMAD4 and CK2 in TE-1 cells measured by RT-qPCR.

E, Proliferation of TE-1 cells detected by EdU assay ( $\times 200$ ). F, Migration of TE-1 cells detected by scratch test. G, Invasion of TE-1 cells detected by Transwell assay ( $\times 200$ ). H, Western blot analysis of EMT-related proteins (E-cadherin, N-cadherin, and Vimentin) in TE-1 cells. \* indicates  $p < 0.05$ , \*\* indicates  $p < 0.01$ , \*\*\* indicates  $p < 0.001$ , \*\*\*\* indicates  $p < 0.0001$ . Comparisons among multiple groups were performed using one-way ANOVA. Data are shown as mean  $\pm$  standard deviation of three technical replicates.

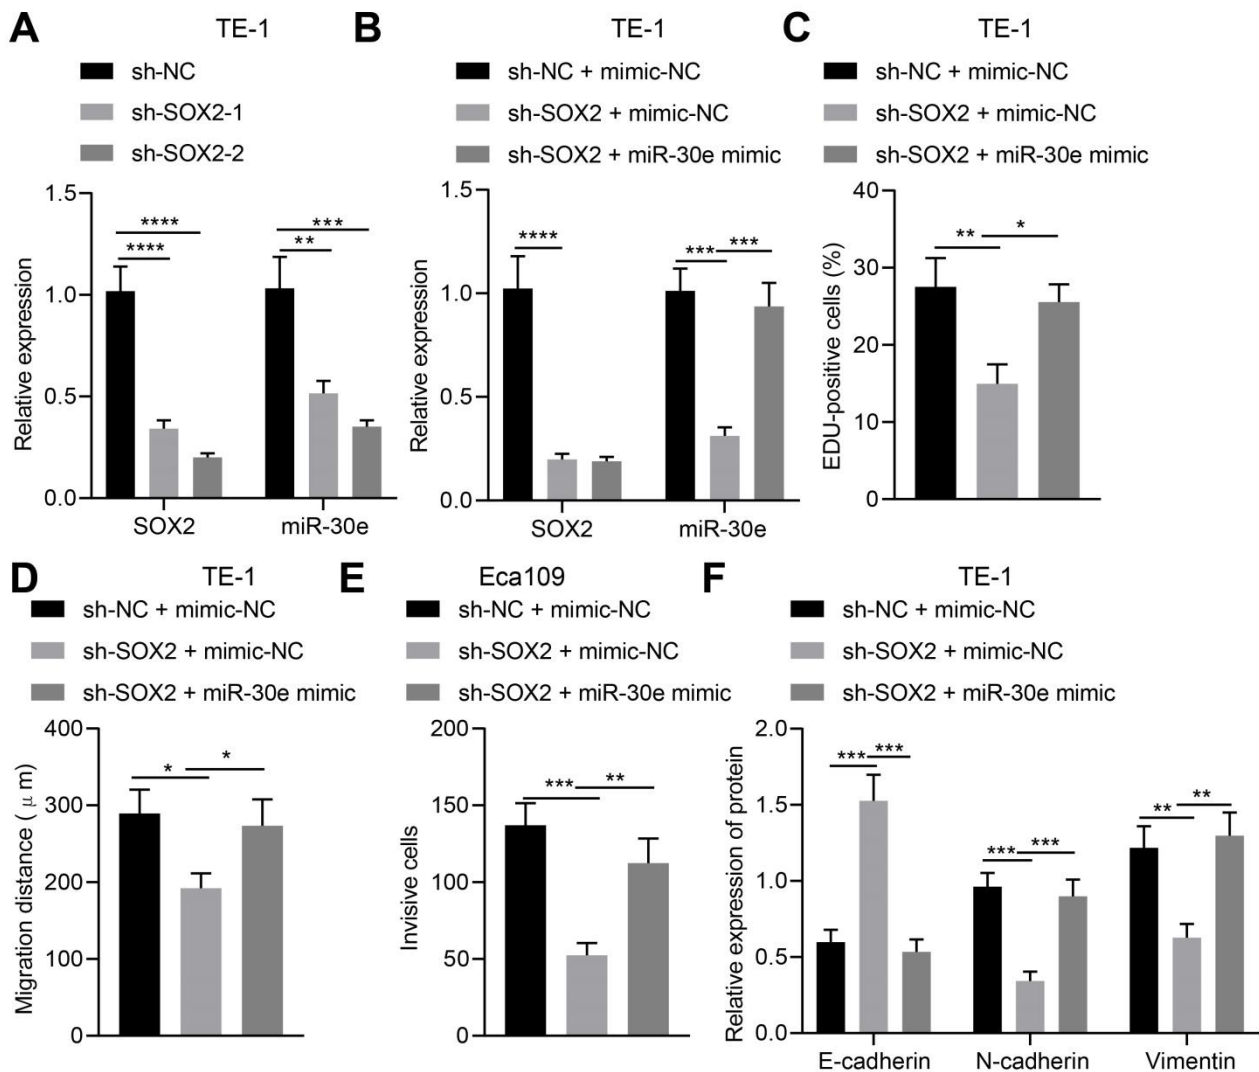

**Fig. S1.** SOX2 promotes proliferation, migration, and invasion, as well as EMT of TE-1 cells *via* miR-30e upregulation *in vitro*. A, Expression of SOX2 and miR-30e in TE-1 cells transfected with sh-SOX2-1 or sh-SOX2-2 measured by RT-qPCR. B, Expression of SOX2 and miR-30e in TE-1 cells transfected with sh-SOX2 or in combination with miR-30e mimic measured by RT-qPCR. C, Proliferation of TE-1 cells detected by EdU assay ( $\times 200$ ). D, Migration of TE-1 cells detected by scratch test. E, Invasion of TE-1 cells detected by Transwell assay ( $\times 200$ ). F, Western blot analysis of EMT-related proteins (E-cadherin, N-cadherin, and Vimentin) in TE-1 cells. \* indicates  $p < 0.05$ , \*\* indicates  $p < 0.01$ , \*\*\* indicates  $p < 0.001$ , \*\*\*\* indicates  $p < 0.0001$ . Comparisons among multiple groups were performed using one-way ANOVA. Data are shown as mean  $\pm$  standard deviation of three technical replicates.

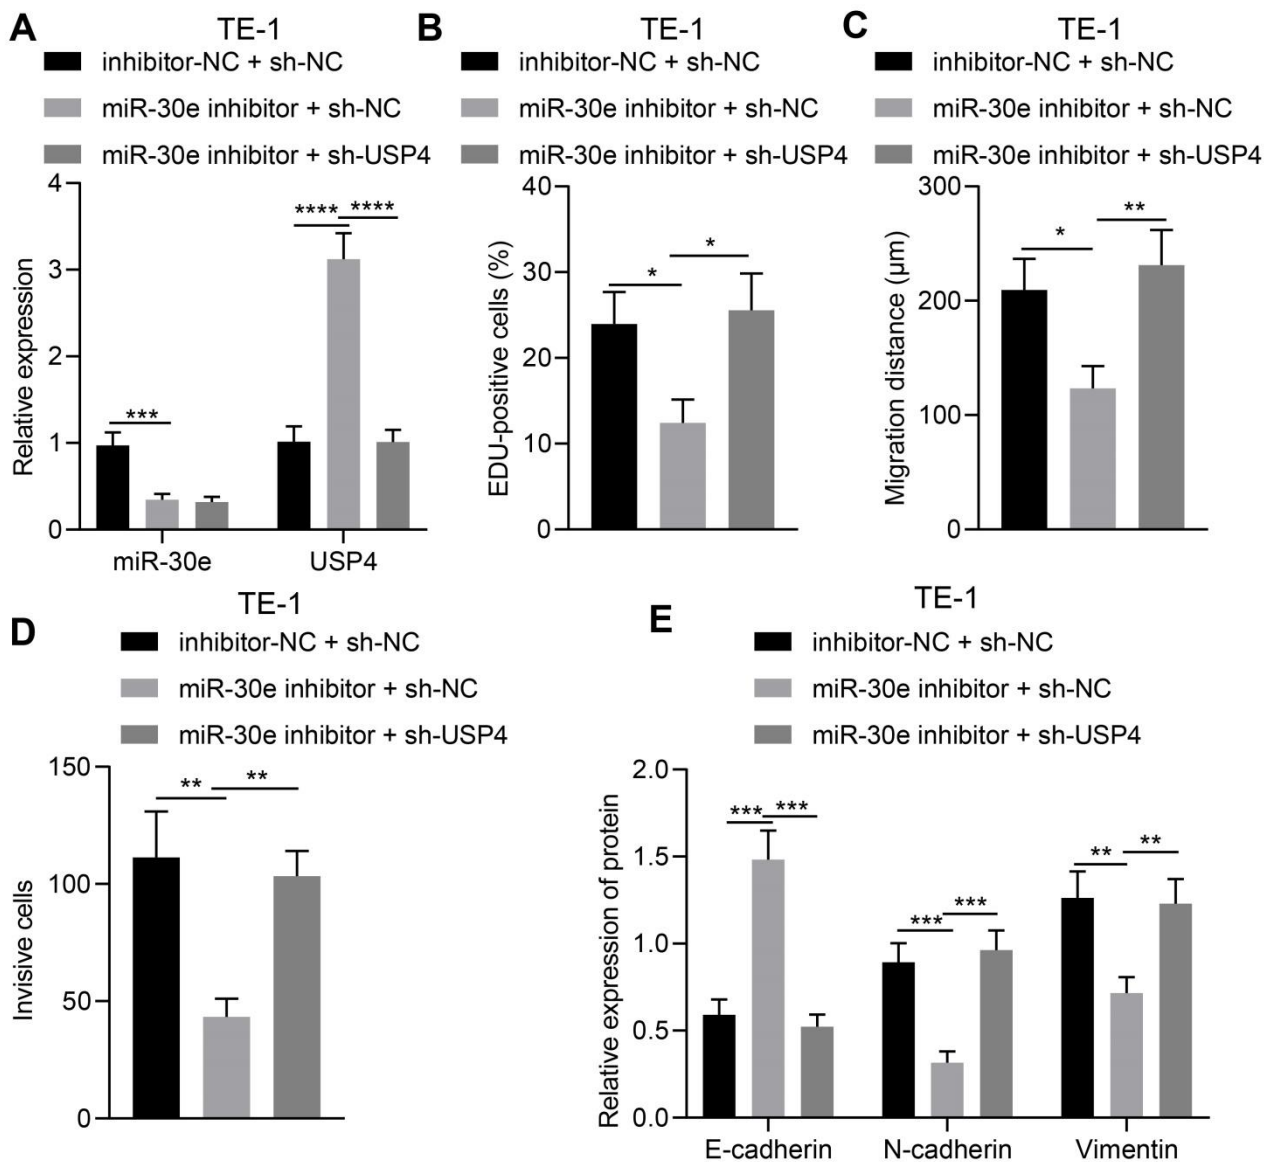

**Fig. S2.** miR-30e promotes cell proliferation, migration, invasion, and EMT in TE-1 cells by targeting USP4 *in vitro*. A, Expression of USP4 and miR-30e determined by RT-qPCR in TE-1 cells transfected with miR-30e inhibitor or in combination with sh-USP4. B, Proliferation of TE-1 cells detected by EdU assay ( $\times 200$ ). C, Migration of TE-1 cells detected by scratch test. D, Invasion of TE-1 cells detected by Transwell assay ( $\times 200$ ). E, Western blot analysis of EMT-related proteins (E-cadherin, N-cadherin, and Vimentin) in TE-1 cells. \* indicates  $p < 0.05$ , \*\* indicates  $p < 0.01$ , \*\*\* indicates  $p < 0.001$ , \*\*\*\* indicates  $p < 0.0001$ . Comparisons among multiple groups were performed using one-way ANOVA. Data are shown as mean  $\pm$  standard deviation of three technical replicates.

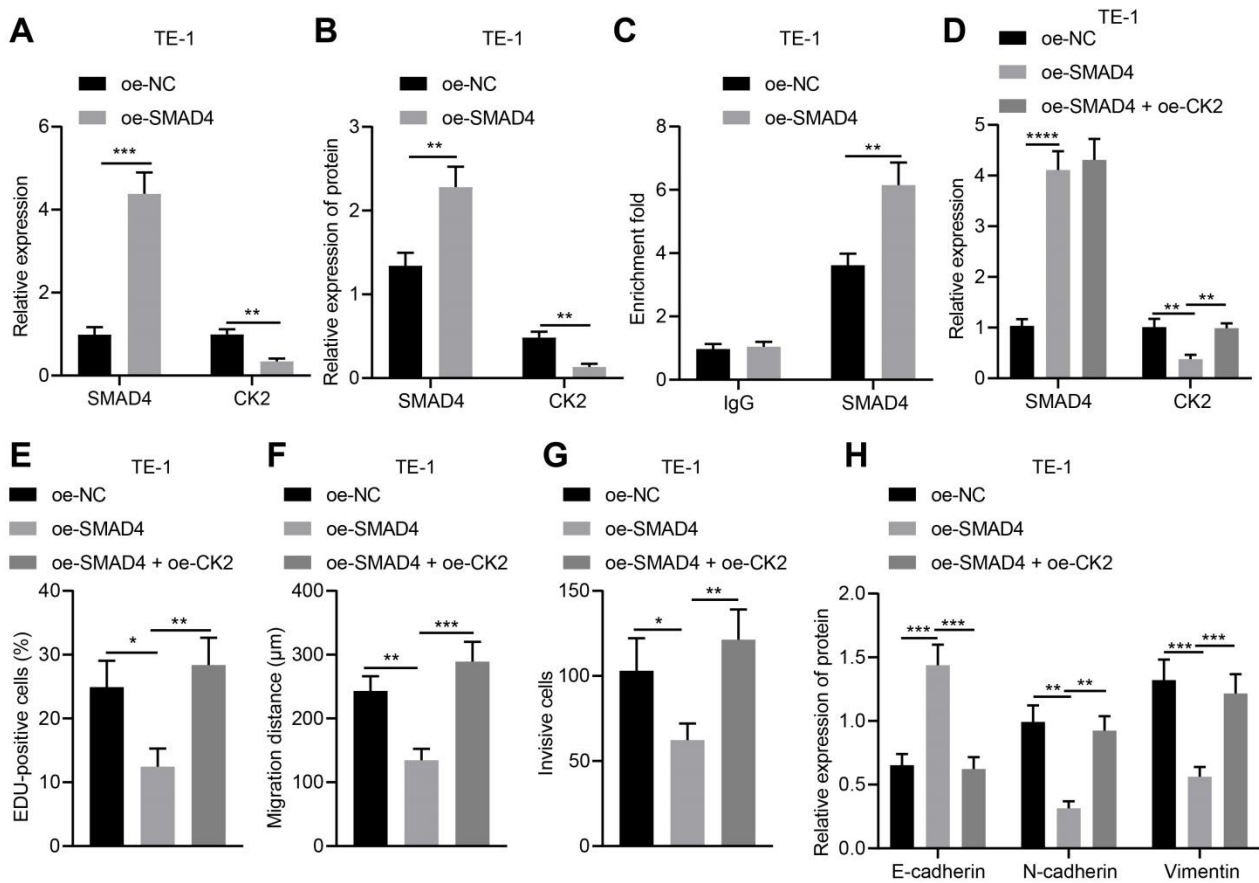

**Fig. S3.** SMAD4 decreased CK2 expression to suppress proliferation, migration, invasion, and EMT of TE-1 cells *in vitro*. A, mRNA expression of SMAD4 and CK2 in TE-1 cells treated with oe-SMAD4 detected by RT-qPCR. B, Western blot analysis of SMAD4 and CK2 proteins in TE-1 cells treated with oe-SMAD4. C, Enrichment of SMAD4 in CK2 promoter region determined by CHIP assay in oe-SMAD4-treated TE-1 cells. TE-1 cells were transfected with oe-NC, oe-SMAD4, and oe-SMAD4 + oe-CK2. D, Expression of SMAD4 and CK2 in TE-1 cells measured by RT-qPCR. E, Proliferation of TE-1 cells detected by EdU assay ( $\times 200$ ). F, Migration of TE-1 cells detected by scratch test. G, Invasion of TE-1 cells detected by Transwell assay ( $\times 200$ ). H, Western blot analysis of EMT-related proteins (E-cadherin, N-cadherin, and Vimentin) in TE-1 cells. \* indicates  $p < 0.05$ , \*\* indicates  $p < 0.01$ , \*\*\* indicates  $p < 0.001$ , \*\*\*\* indicates  $p < 0.0001$ . Comparisons among multiple groups were performed using one-way ANOVA. Data are shown as mean  $\pm$  standard deviation of three technical replicates.
